# Supplementary material for: Supporting palladium metal on gold nanoparticles improves its catalysis for nitrite reduction
Source: Royal Society of Chemistry journal article supplement (doi:10.1039/c3nr04540d), 2013-10-30
Supplement: c3nr04540d.pdf [file c3nr04540d.pdf]

Supporting Information

**Supporting Palladium Metal on Gold Nanoparticles Improves Its  
Catalysis for Nitrite Reduction**

Huifeng Qian,<sup>1</sup> Zhun Zhao<sup>1</sup>, Juan C. Velazquez,<sup>1</sup> Lori A. Pretzer,<sup>2</sup> Kimberly N. Heck<sup>1</sup>  
and Michael S. Wong<sup>1,2,3\*</sup>

<sup>1</sup>*Department of Chemical and Biomolecular Engineering,*

<sup>2</sup>*Department of Chemistry,*

<sup>3</sup>*Department of Civil and Environmental Engineering*

*Rice University, 6100 Main Street, Houston, TX 77005-1892, USA*

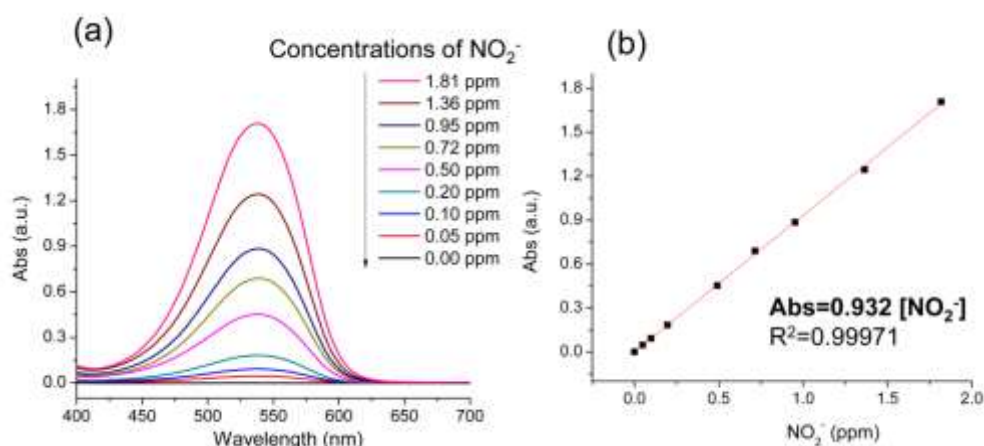

**Figure S1.** (a) UV-Vis absorption spectra of Griess's reagent reacted with various concentration of nitrite. (b) Standard curve of nitrite concentration (x-axis) against absorbance at 540 nm (y-axis).

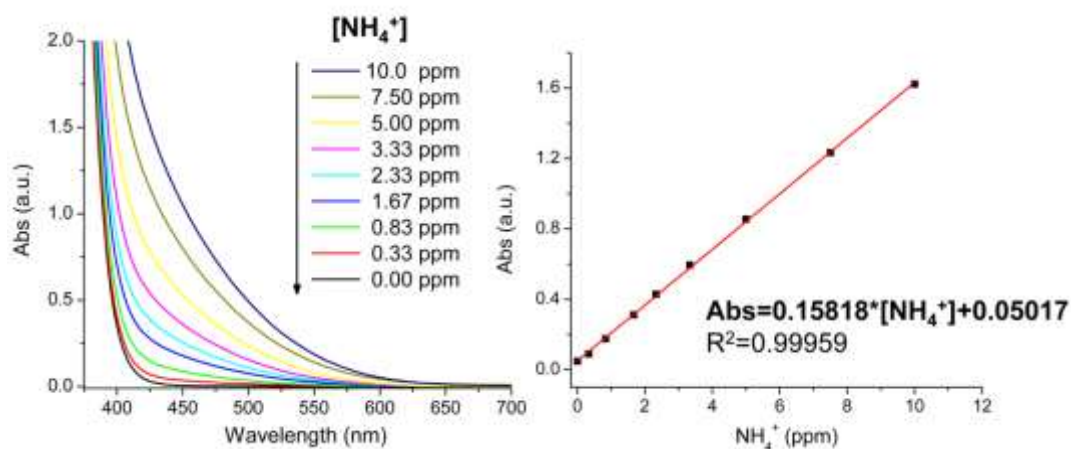

**Figure S2.** (a) UV-Vis absorption spectra of Nessler's reagent reacted with various concentration of  $\text{NH}_4^+$ . (b) Standard curve of concentration of  $\text{NH}_4^+$  (x-axis) against absorbance at 420 nm (y-axis).

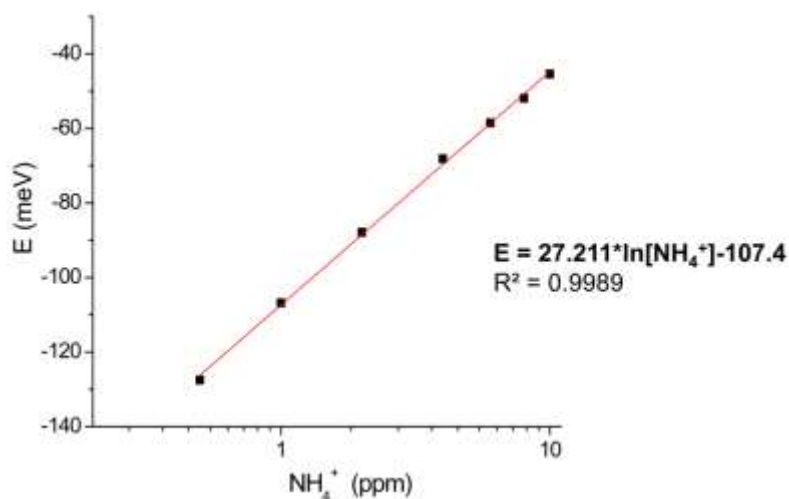

**Figure S3.** Standard curve of ammonia concentration (x-axis) against potentials (y-axis) measured by ammonia ion selective electrode.

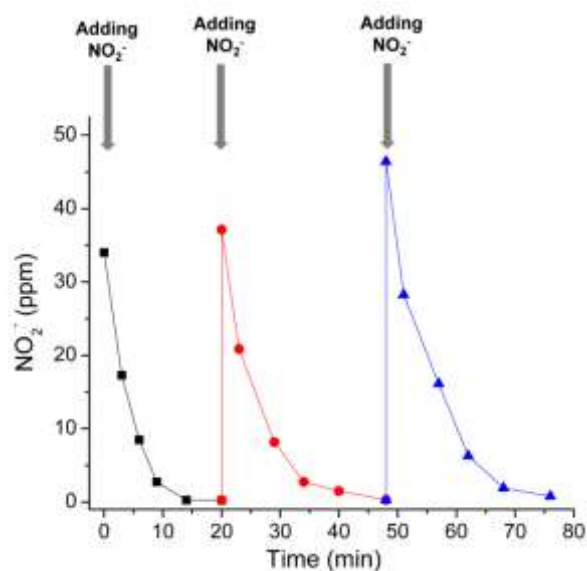

**Figure S4.** Nitrite concentration profile after adding additional nitrite reactant to the reactor at 20 min and at 47 min. Reaction conditions: 60 sc% Pd-on-Au NPs with 0.365 mg/L Pd in reactor, 120 mL/min  $\text{H}_2$ , 120 mL/min  $\text{CO}_2$ , 400 rpm stirring rate, 1 atm pressure.

**Table S1.** Actual volume of Pd-on-Au solution and nanopure water added to reactor

| Sample name          | Volume of Pd-on-Au (mL) | Volume of nanopure water (mL) |
|----------------------|-------------------------|-------------------------------|
| 10 sc% Pd-on-Au NPs  | 30                      | 69.60                         |
| 30 sc% Pd-on-Au NPs  | 10                      | 89.60                         |
| 60 sc% Pd-on-Au NPs  | 5                       | 94.60                         |
| 80 sc% Pd-on-Au NPs  | 3.75                    | 95.85                         |
| 100 sc% Pd-on-Au NPs | 3                       | 96.60                         |
| 150 sc% Pd-on-Au NPs | 1.84                    | 97.76                         |
| 300 sc% Pd-on-Au NPs | 0.78                    | 98.82                         |
| Pd NPs               | 0.83                    | 98.77                         |

**Table S2.** Actual volume of 1 M NaCl solution and nanopure water added to reactor

| Concentration of $\text{Cl}^-$ (mol/L) | Volume of 1M NaCl (mL) | Volume of nanopure water (mL) |
|----------------------------------------|------------------------|-------------------------------|
| 0                                      | 0                      | 99.6                          |
| 0.001                                  | 0.01                   | 99.59                         |
| 0.005                                  | 0.05                   | 99.55                         |
| 0.02                                   | 0.2                    | 99.4                          |
| 0.05                                   | 0.5                    | 99.1                          |
